# Supplementary material for: Crystallinity of regenerated cellulose from [Bmim]Cl dependent on the hydrogen bond acidity/basicity of anti-solvents
Source: Royal Society of Chemistry journal article supplement (doi:10.1039/c7ra08178b), 2017-01-01
Supplement: c7ra08178b1.pdf [file c7ra08178b1.pdf]

## **Crystallinity of regenerated cellulose from [Bmim]Cl dependent on the hydrogen bond acidity/basicity of anti-solvents**

*Zhaosheng Fan<sup>a</sup>, Jianbo Chen<sup>b</sup>, Wenji Guo<sup>a</sup>, Fang Ma<sup>a</sup>, Suqin Sun<sup>a</sup> and Qun Zhou<sup>\*a</sup>*

*a.* Department of Chemistry, Key Laboratory of Bioorganic Phosphorus Chemistry & Chemical Biology (Ministry of Education), Tsinghua University, Beijing 100084, China.

*b.* School of Life Sciences, Beijing University of Chinese Medicine, Beijing 100029, China

### AUTHOR INFORMATION

#### **Corresponding Author**

\* E-mail: [zhouqun@mail.tsinghua.edu.cn](mailto:zhouqun@mail.tsinghua.edu.cn)

### **This file includes:**

**1. Fig. S1**

**2. Fig. S2**

**3. Table S1**

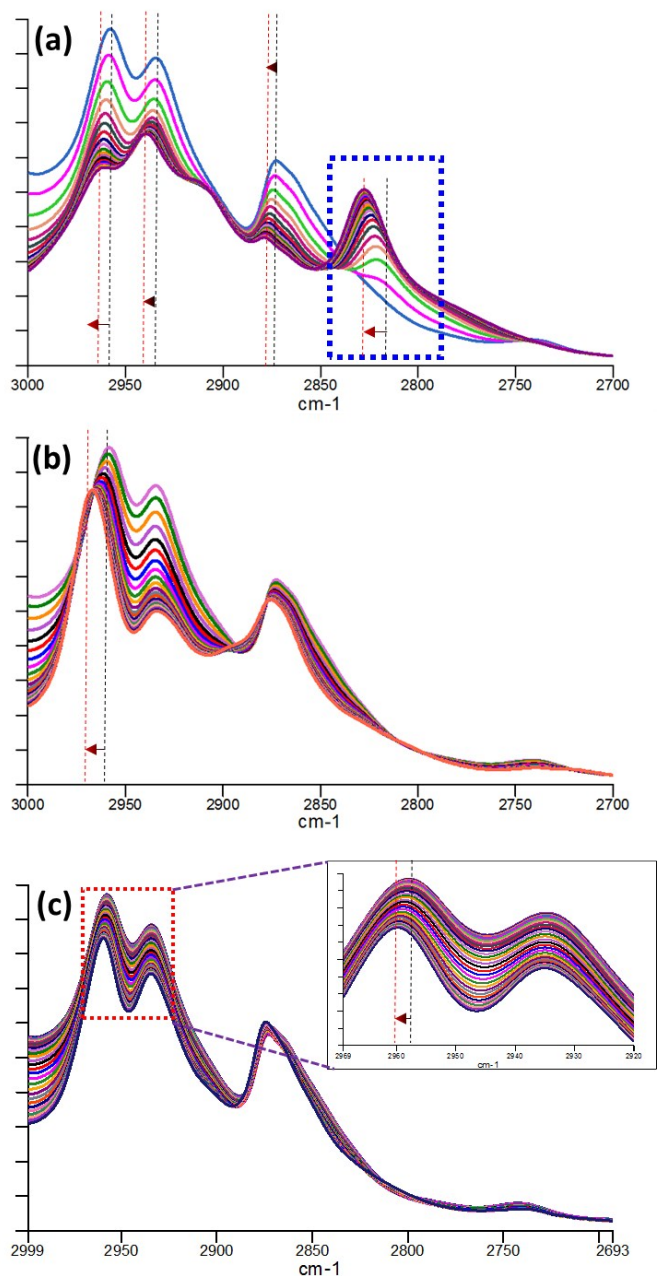

**Fig. S1** Blue shift of peaks assigned to alkyl C-H stretching of IL and AS: (a) methanol, (b) ethanol and (c) *n*-propanol. Peak enclosed by blue dash frame is characteristic for methanol. IL peaks overlap peaks of ethanol and propanol. The inset in (c) was enlarged diagram of spectra.

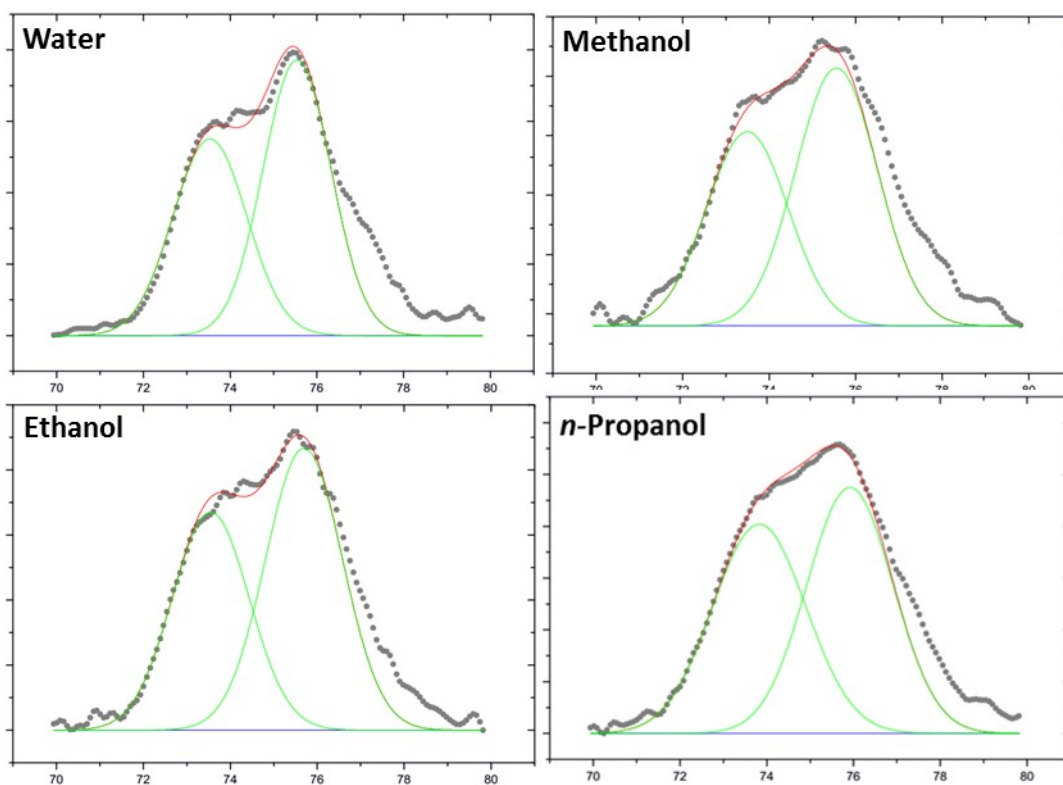

**Fig. S2**  $^{13}\text{C}$  NMR spectra peak fitting of regenerated by different anti-solvents to measure the regularity of regenerated cellulose by relative peak height (RPH)

**Table S1.** Diffusion coefficients and cellulose regularity calculated by different methods

| Anti-solvent       | Diffusion coefficient<br>( $10^{-6} \text{ cm}^2/\text{s}$ ) | Cellulose regularity |            |
|--------------------|--------------------------------------------------------------|----------------------|------------|
|                    |                                                              | FWHM of XRD          | RPH of NMR |
| Water              | $27.39 \pm 1.68$                                             | 24.96                | 0.7124     |
| Methanol           | $10.5 \pm 1.51$                                              | 10.62                | 0.7283     |
| Ethanol            | $3.32 \pm 0.82$                                              | 6.32                 | 0.7742     |
| <i>n</i> -Propanol | $2.03 \pm 0.47$                                              | 6.23                 | 0.8523     |
